# Supplementary material for: An investigation of the role increasing π-conjugation has on the efficiency of dye-sensitized solar cells fabricated from ferrocene-based dyes
Source: Royal Society of Chemistry journal article supplement (doi:10.1039/c5ra21565j), 2016-01-01

## Electronic Supplementary Information

### *An investigation of the role increasing $\pi$ -conjugation has on the efficiency of dye-sensitized solar cells fabricated from ferrocene-based dyes*

Michele Cariello<sup>†a</sup>, Sungwoo Ahn<sup>†b</sup>, Kwang-Won Park<sup>†b</sup>, Suk-Kyu Chang<sup>b</sup>, Jongin Hong<sup>\*b</sup>, Graeme Cooke<sup>\*a</sup>.

<sup>a</sup> Glasgow Centre for Physical Organic Chemistry, WestCHEM, School of Chemistry, University of Glasgow, Glasgow G12 8QQ, UK

<sup>b</sup> Department of Chemistry, Chung-Ang University, Seoul 06974, Republic of Korea.

#### 1. Cyclic voltammetry

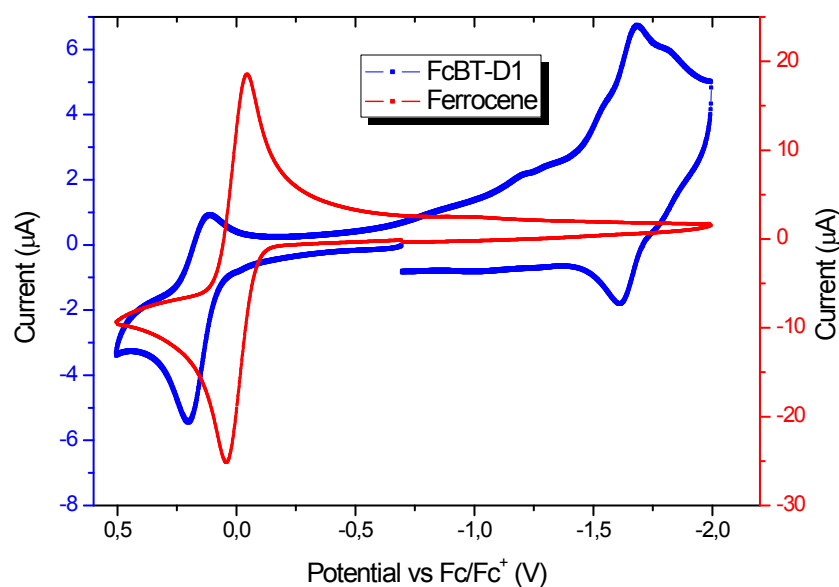

**Fig. S1.** Cyclic voltammogram of a solution of **Fc-D1** ( $1 \times 10^{-3}$ M) in DMF (blue line) and of ferrocene in DMF (red line), performed using a Pt working electrode, a Pt counter electrode and a Ag wire as a pseudo-reference electrode. TBAPF<sub>6</sub> (0.1M) was used as supporting electrolyte and the collected data were referred to the redox potential of the Fc/Fc<sup>+</sup> couple.

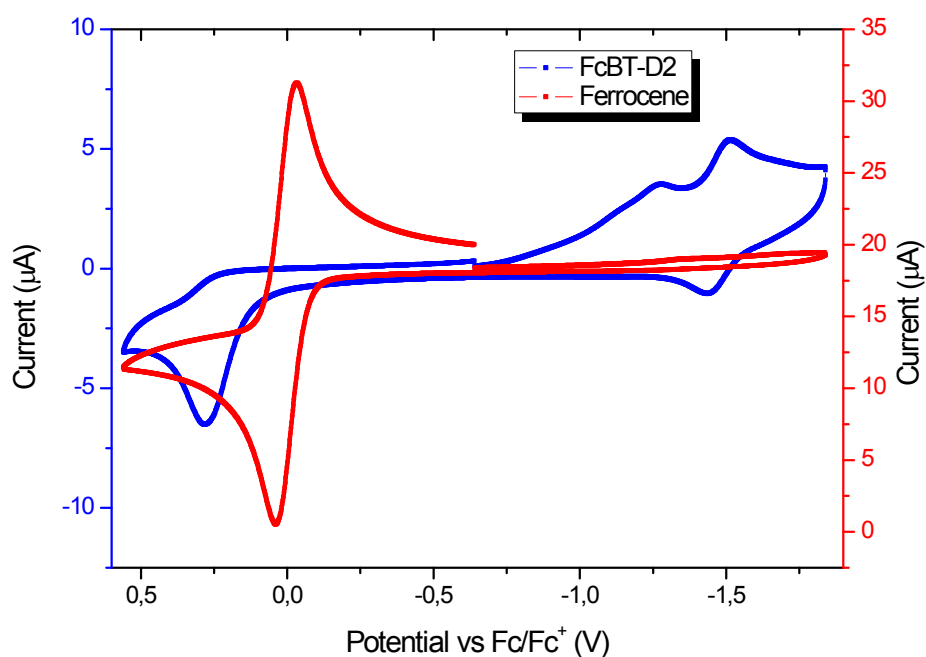

**Fig. S2.** Cyclic voltammogram of a solution of **Fc-D2** ( $1 \times 10^{-3}\text{M}$ ) in DMF (blue line) and of ferrocene in DMF (red line), performed using a Pt working electrode, a Pt counter electrode and a Ag wire as a pseudo-reference electrode.  $\text{TBAPF}_6$  (0.1M) was used as supporting electrolyte and the collected data were referred to the redox potential of the  $\text{Fc}/\text{Fc}^+$  couple.

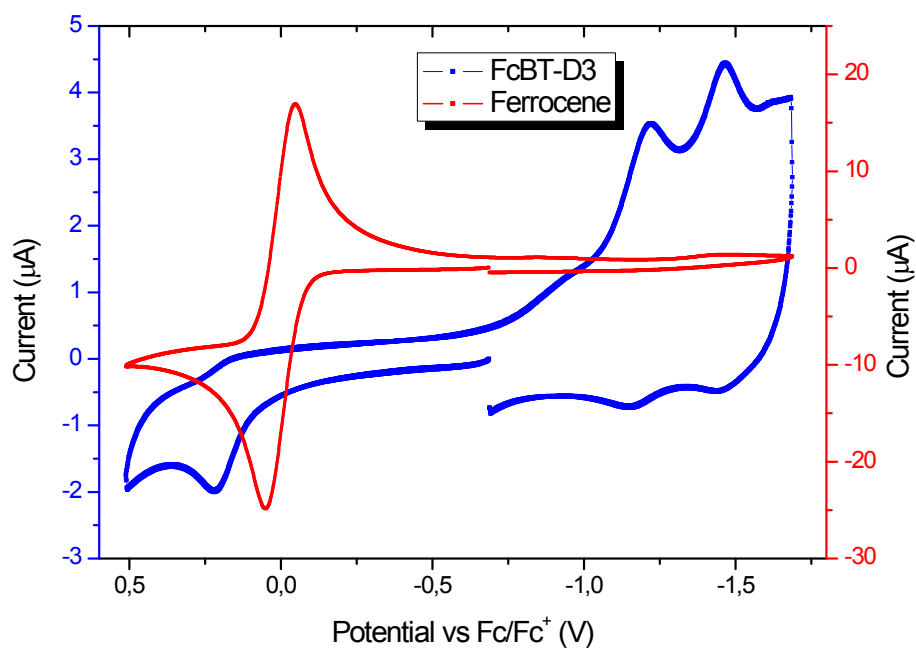

**Fig. S3.** Cyclic voltammogram of a solution of **Fc-D3** ( $1 \times 10^{-3}\text{M}$ ) in DMF (blue line) and of ferrocene in DMF (red line), performed using a Pt working electrode, a Pt counter electrode and a Ag wire as a pseudo-reference electrode.  $\text{TBAPF}_6$  (0.1M) was used as supporting electrolyte and the collected data were referred to the redox potential of the  $\text{Fc}/\text{Fc}^+$  couple.

## 2. NMR Spectra

### Compound 3

$^1\text{H}$  (400 MHz,  $\text{CDCl}_3$ , TMS)

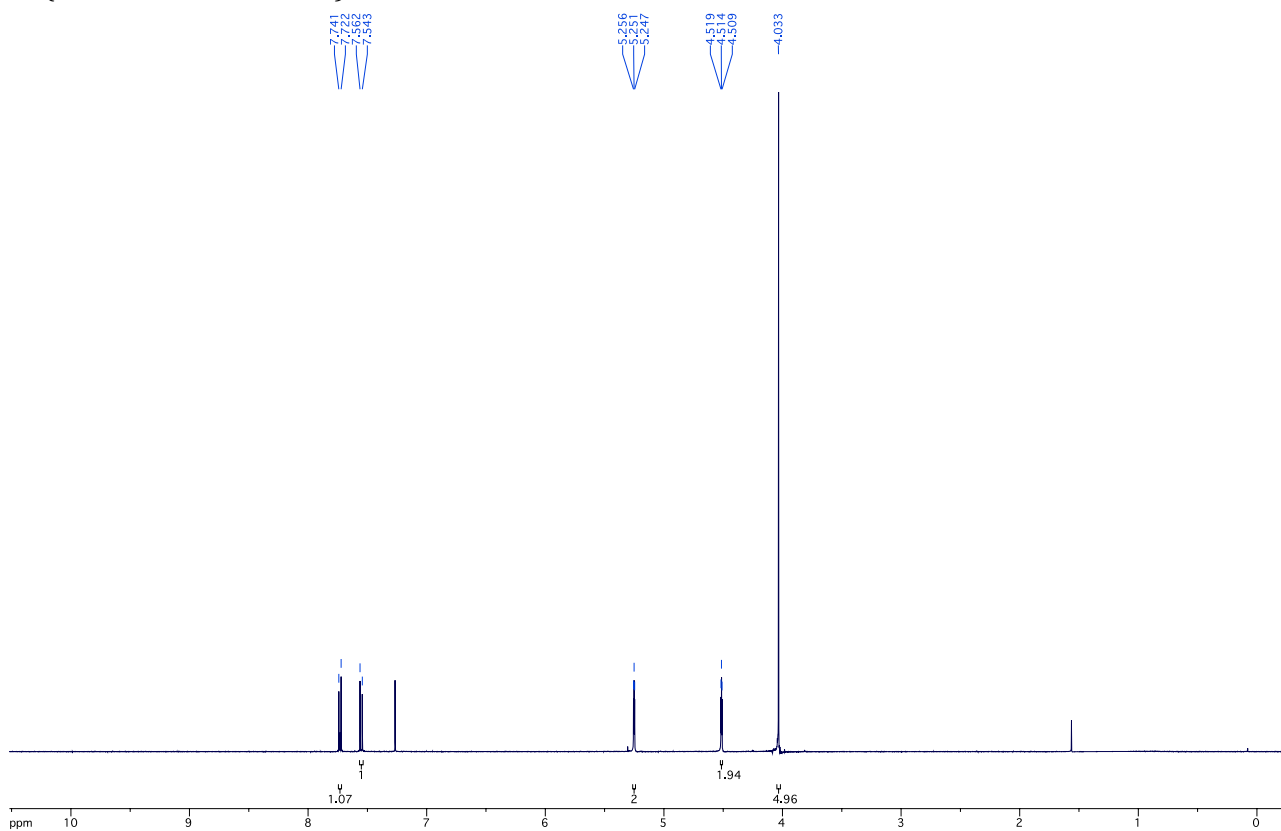

$^{13}\text{C}$  (100 MHz,  $\text{CDCl}_3$ , TMS)

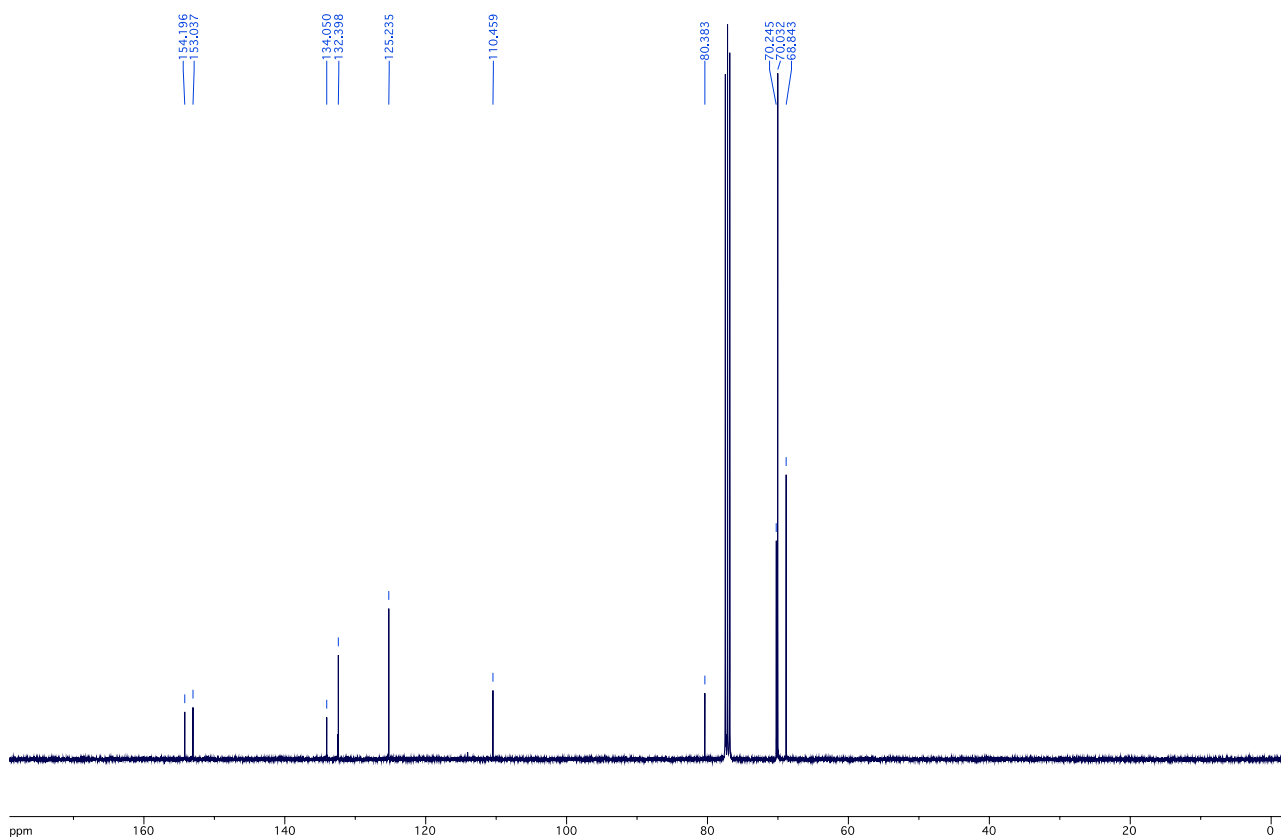

# Compound 4

$^1\text{H}$  (400 MHz,  $\text{CDCl}_3$ , TMS)

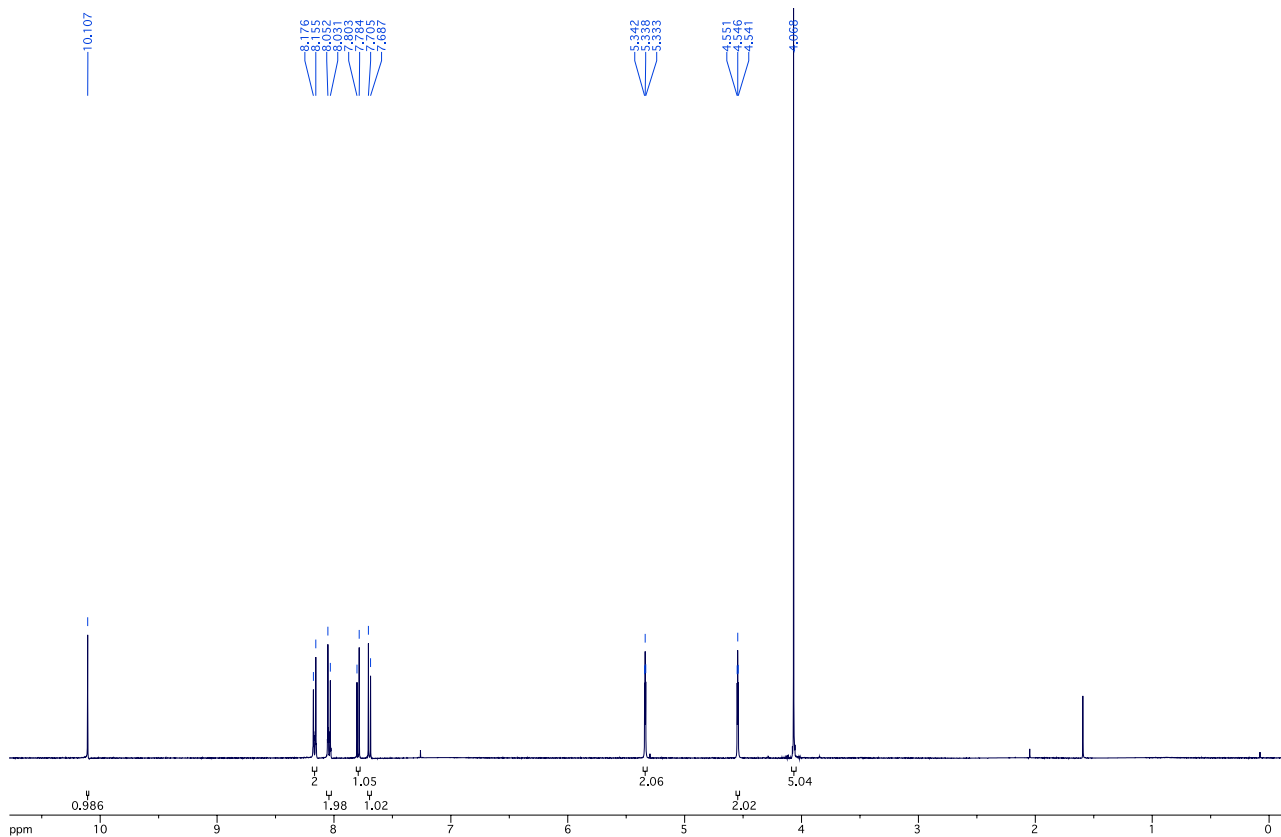

$^{13}\text{C}$  (100 MHz,  $\text{CDCl}_3$ , TMS)

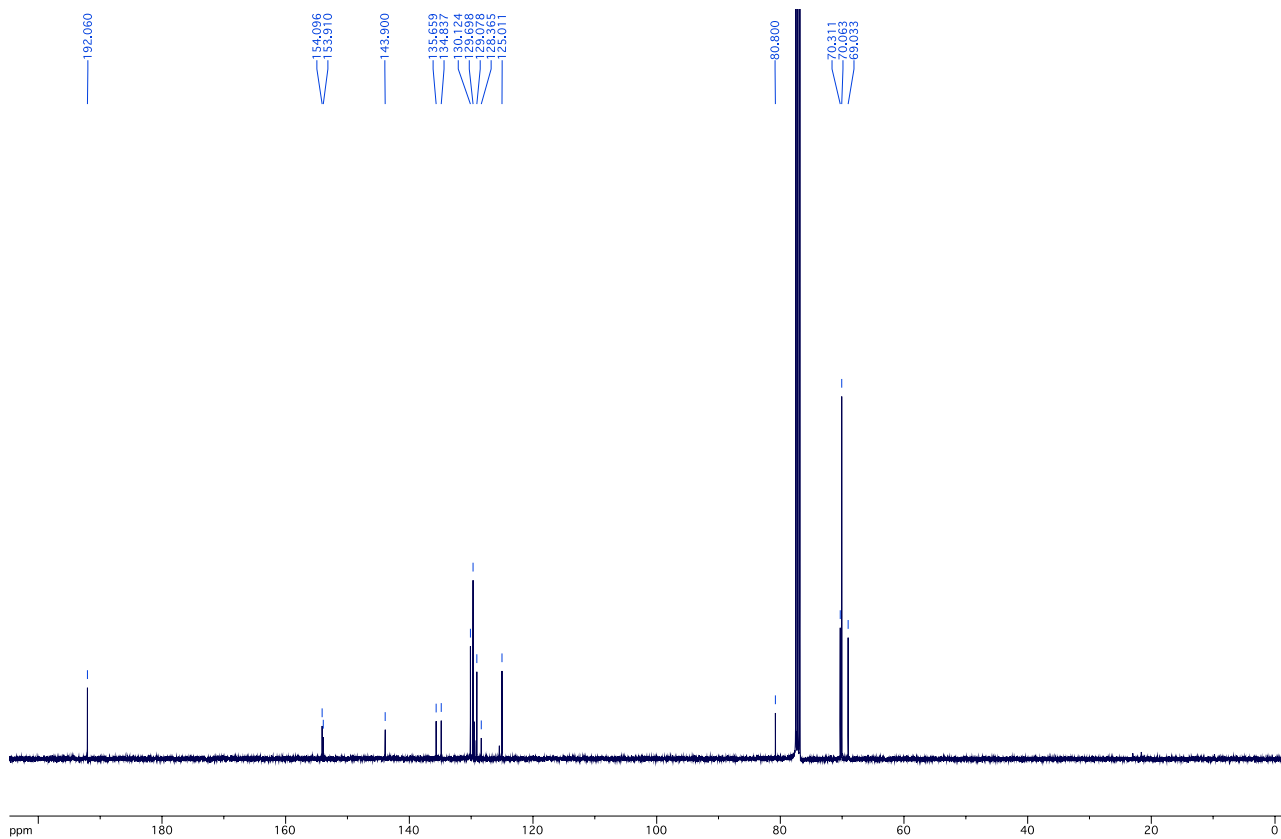

# Compound 7

$^1\text{H}$  (400 MHz,  $\text{CDCl}_3$ , TMS)

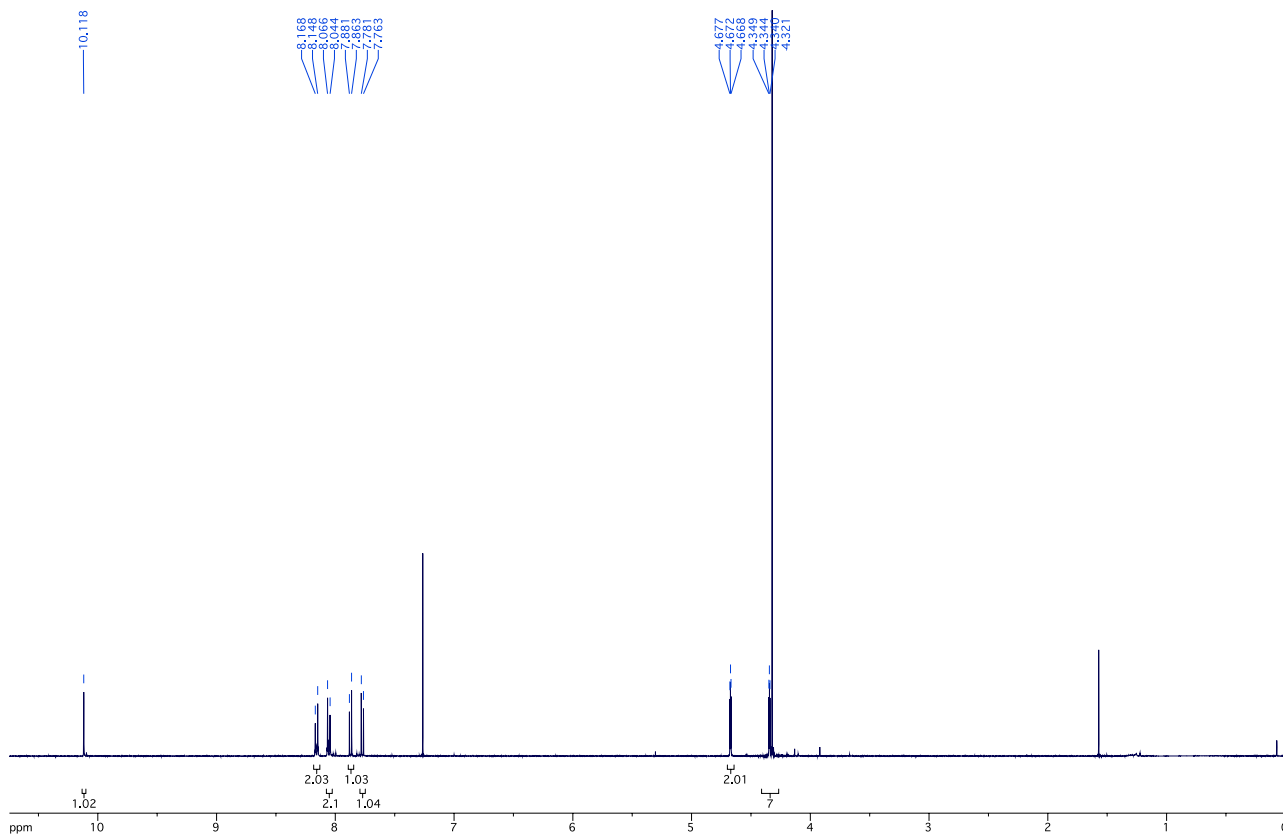

$^{13}\text{C}$  (100 MHz,  $\text{CDCl}_3$ , TMS)

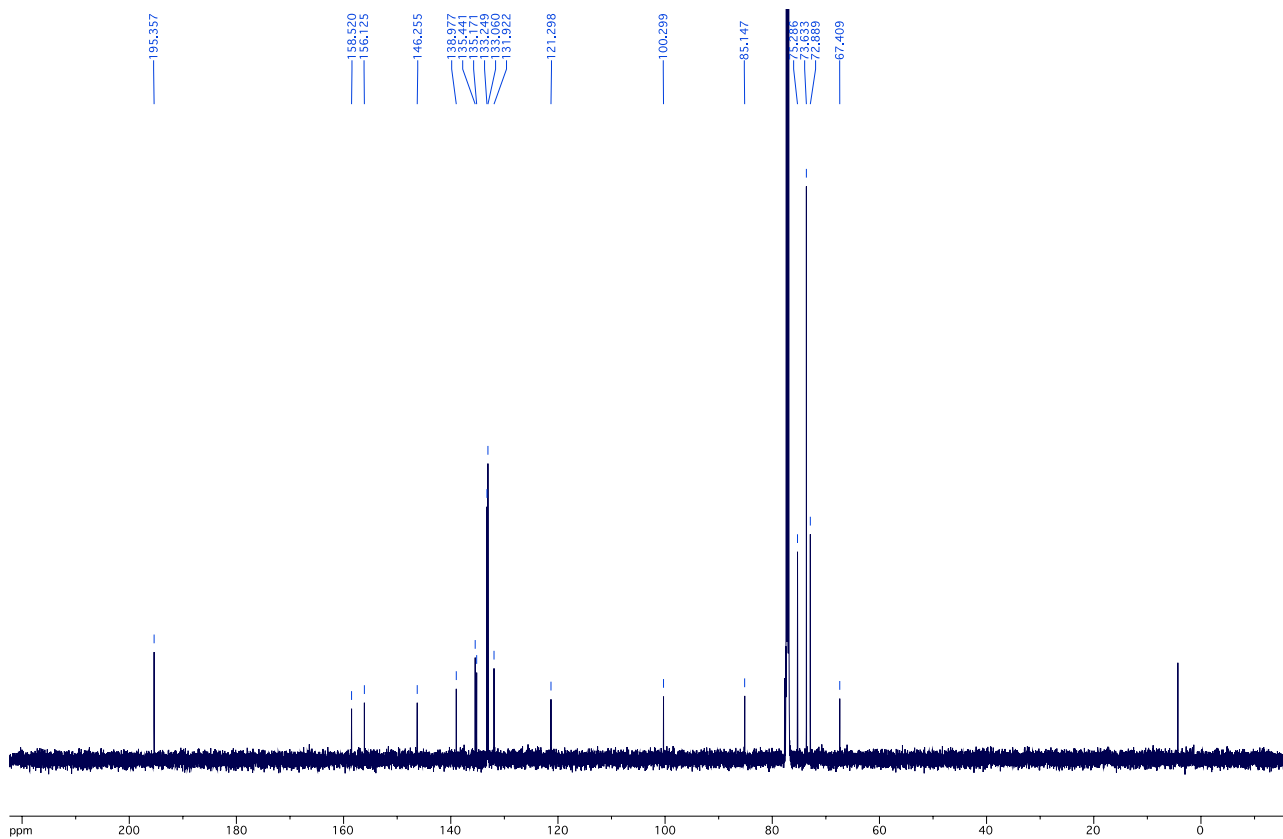

# Compound 8

$^1\text{H}$  (500 MHz,  $\text{CDCl}_3$ , TMS)

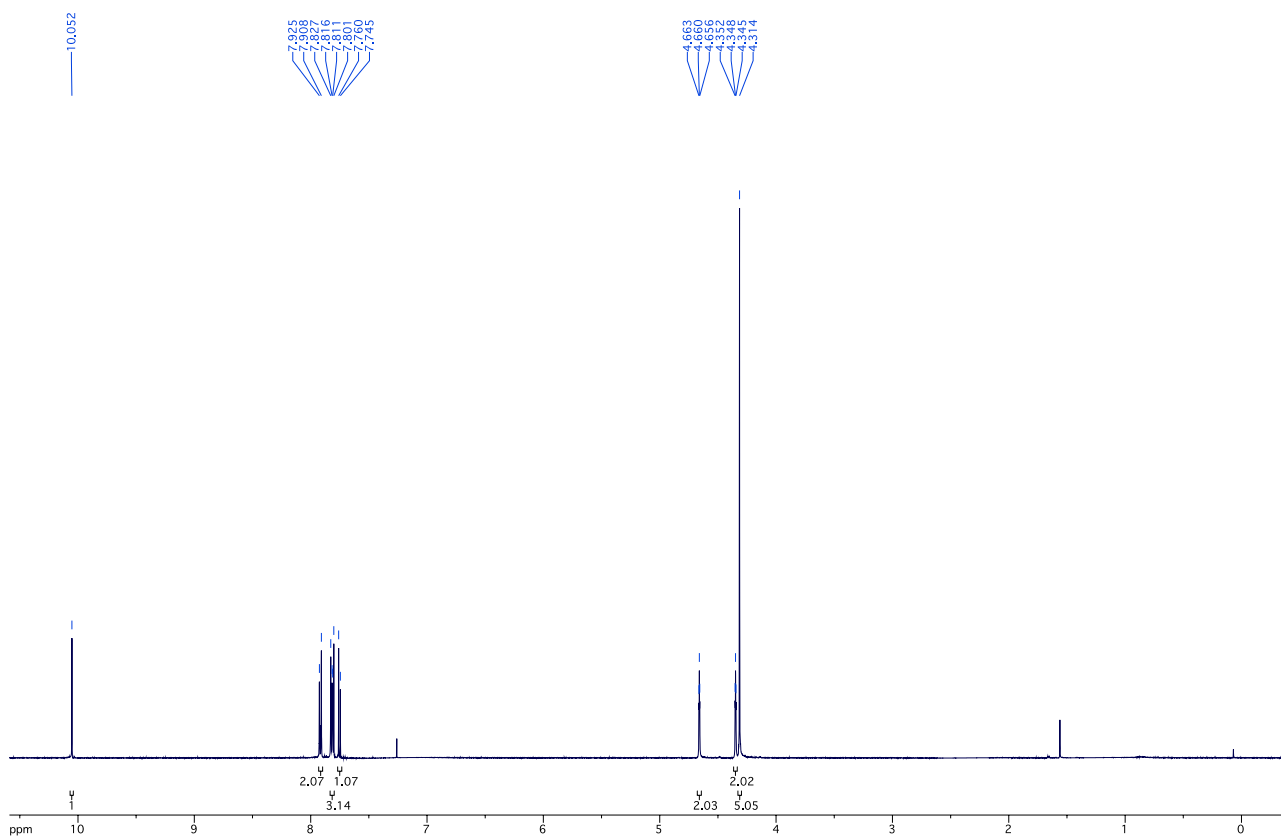

$^{13}\text{C}$  (125 MHz,  $\text{CDCl}_3$ , TMS)

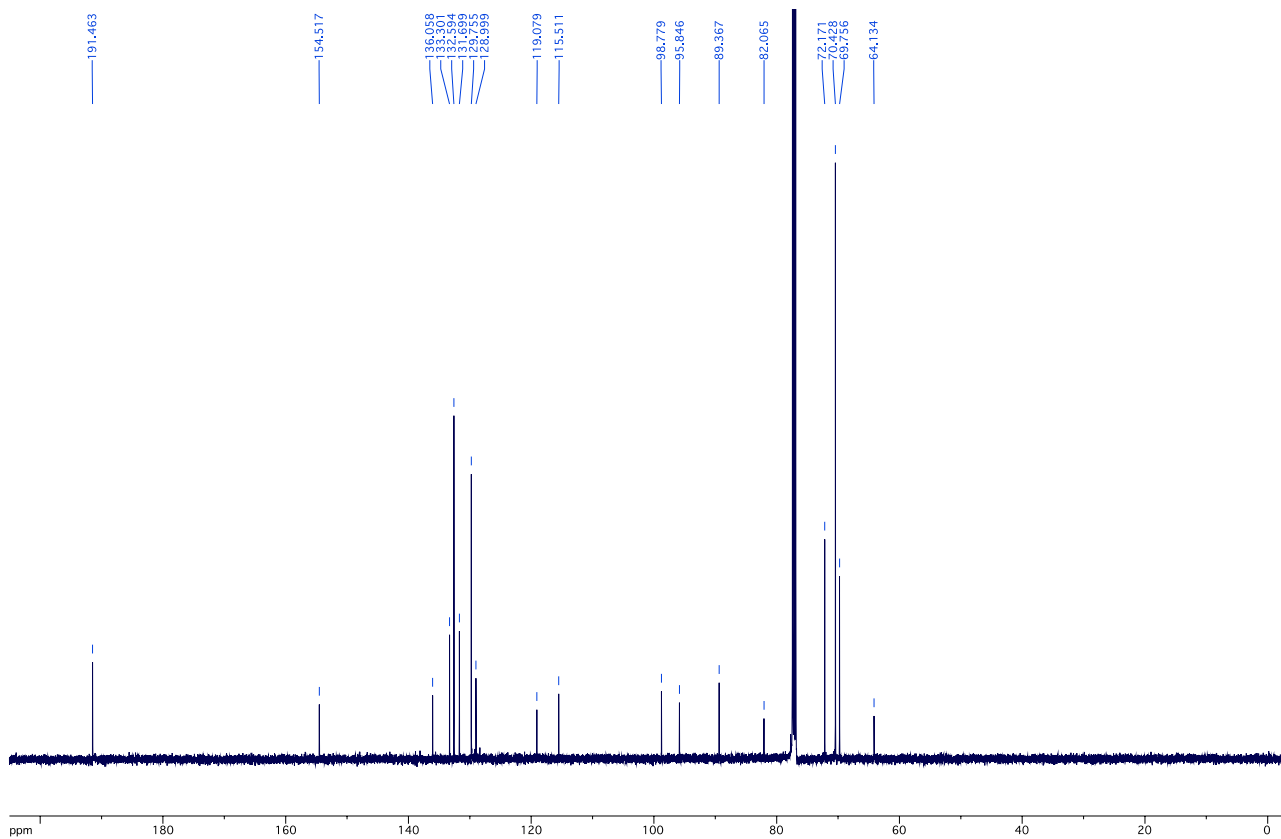

**Fc-D1**

$^1\text{H}$  (400 MHz, *d*-DMSO, TMS)

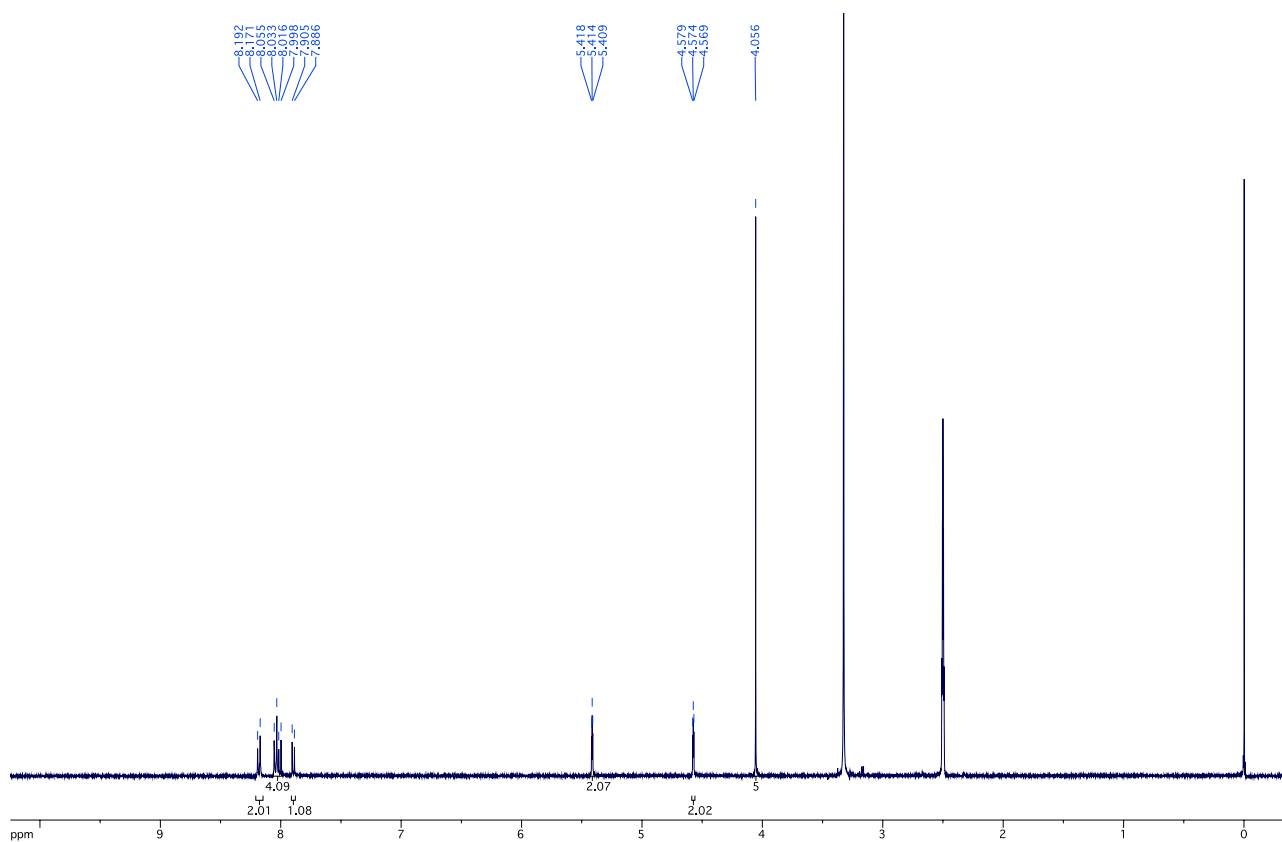



**Fc-D2**

$^1\text{H}$  (400 MHz, *d*-DMSO, TMS)

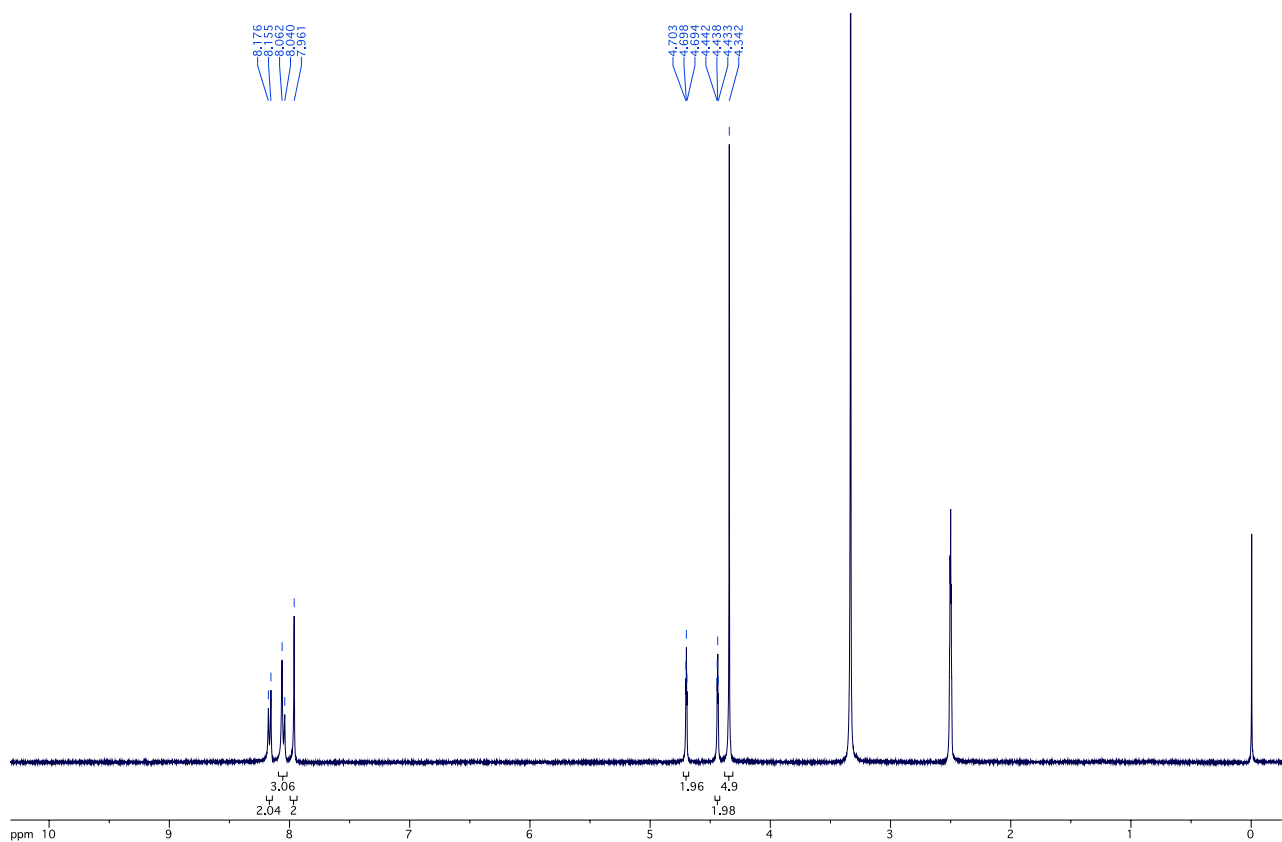

**Fc-D3****<sup>1</sup>H** (400 MHz, *d*-DMSO, TMS)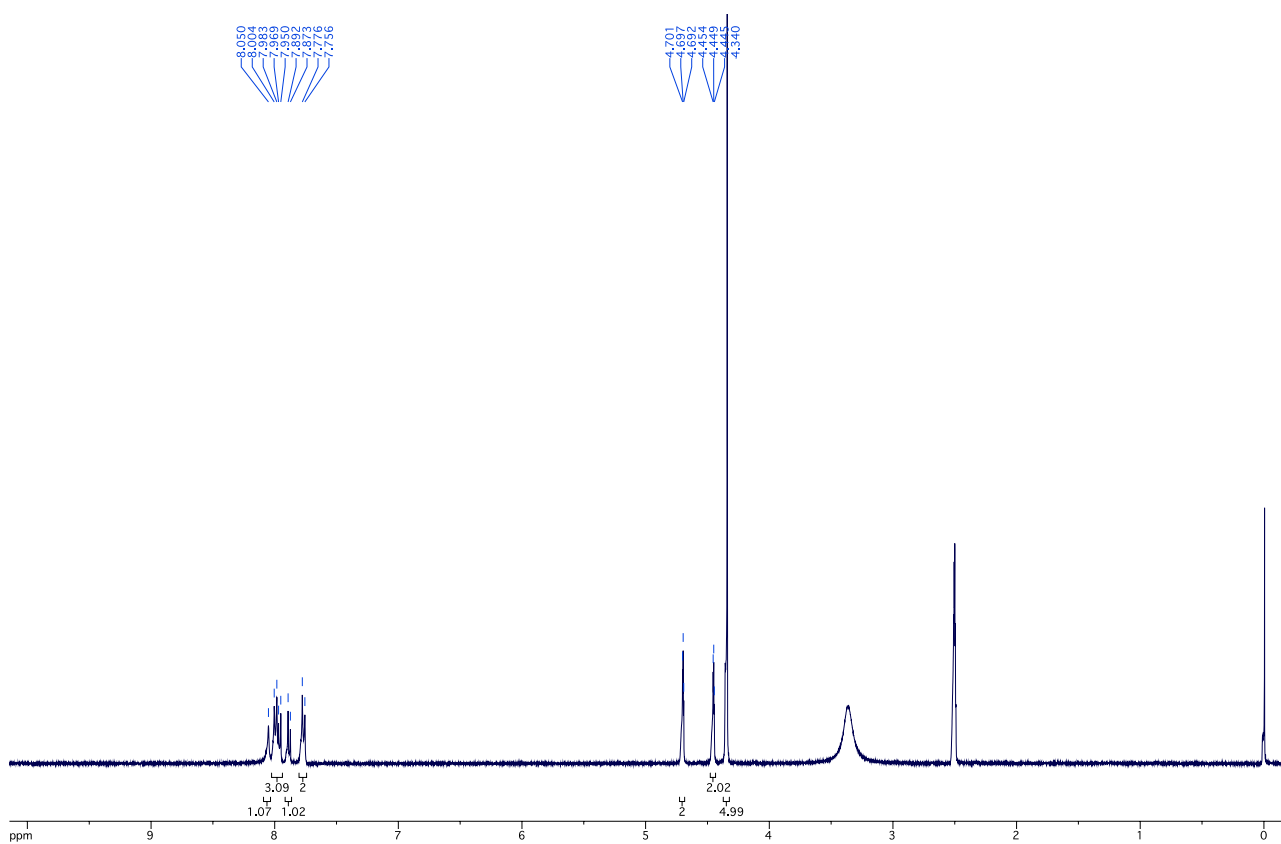

Supplement: c5ra21565j1.pdf [file c5ra21565j1.pdf]
